# Supplementary material
Source: Springer Nature journal article supplement (https://www.springermedizin.de/resource/supplementary/12985_2010_1017_MOESM3_ESM.pdf/9608956)
Supplement: MOESM3 [file 9608956]

GGCAGCACCTCAGCAGCAACATGCCAGCA Majority

40 50 60

|    |                                |                      |     |
|----|--------------------------------|----------------------|-----|
| 31 | GGCAGCAC                       | TCAGCAGCAACATGCCAGCA | AH  |
| 31 | GGCAGCAC                       | TCAGCAGCAACATGCCAGCA | MDJ |
| 31 | GGCAGCACCTCAGCAGCAACATGCCAGCA  |                      | YJ  |
| 31 | GGCAGCACCTCAGCAGCAACATGCCAGCA  |                      | AS  |
| 31 | GGCAGCACCTCAGCAGCAACATGCCAGCA  |                      | BDH |
| 31 | GGCAGCACCTCAGCAGCAACATGCCAGCA  |                      | BY  |
| 31 | GGCAGCACCTCAGCAGCAACATGCCAGCA  |                      | CF  |
| 31 | GGCAGCACCTCAGCAGCAACATGCCAGCA  |                      | HL  |
| 31 | GGCAGCACCTCAGCAGCAACATGCCAGCA  |                      | HN  |
| 31 | GGCAGCACCTCAGCAGCAACATGCCAGCA  |                      | JF  |
| 31 | GGCAGCACCTCAGCAGCAACATGCCAGCA  |                      | JMS |
| 31 | GGCAGCACCTCAGCAGCAACATGCCAGCA  |                      | JS  |
| 31 | GGCAGCACCTCAGCAGCAACATGCCAGCA  |                      | MZL |
| 31 | GGCAGCACCTCAGCAGCAACATGCCAGCA  |                      | QTH |
| 31 | GGCAGCACCTCAGCAGCGACATGCCAGCA  |                      | SH  |
| 31 | GGCAGCACCTCAGCAGCAACATGCCAGCA  |                      | SY  |
| 31 | GGCAGCACCTCAGCAGCAACATGCCAGCA  |                      | WF  |
| 31 | GGCAGCACCTCAGCAGCAACATGCACAGCA |                      | CL  |
| 31 | GGCAGCACCTCAGCAGCAACATGCCAGCA  |                      | LG  |

TTTTATTATTCATTAAGGG-TTAAGTGGGG Majority

1030 1040 1050

|      |                     |            |     |
|------|---------------------|------------|-----|
| 1020 | TTTTATTATTCACTTAGGG | TTAAGTGGGG | AH  |
| 1020 | TTTTATTATTCACTTAGGG | TTAAGTGGGG | MDJ |
| 1021 | TTTTATTATTCATTAAGG  | TTAAGTGGGG | YJ  |
| 1021 | TTTTATTATTCATTAAGGG | TTAAGTGGGG | AS  |
| 1021 | TTTTATTATTCACTTAGGG | TTAAGTGGGG | BDH |
| 1021 | TTTTATTATTCATTAAGGG | TTAAGTGGGG | BY  |
| 1021 | TTTTATTATTCATTAAGGG | TTAAGTGGGG | CF  |
| 1021 | TTTTATTATTCATTAAGGG | TTAAGTGGGG | HL  |
| 1021 | TTTTATTATTCATTAAGGG | TTAAGTGGGG | HN  |
| 1021 | TTTTATTATTCATTAAGGG | TTAAGTGGGG | JF  |
| 1021 | TTTTATTATTCATTAAGGG | TTAAGTGGGG | JMS |
| 1021 | TTTTATTATTCATTAAGGG | TTAAGTGGGG | JS  |
| 1021 | TTTTATTATTTATTAAGGG | TTAAGTGGGG | MZL |
| 1021 | TTTTATTATTCATTAAGGG | TTAAGTGGGG | QTH |
| 1021 | TTTTATTATTCATTAAGGG | TTAAGTGTGG | SH  |
| 1021 | TTTTATTATTCATTAAGGG | TTAAGTGGGG | SY  |
| 1021 | TTTTATTATTCATTAAGGG | TTAAGTGGGG | WF  |
| 1021 | TTTTATTATTCATTTAGGG | TTAAGTGGGG | CL  |
| 1021 | TTTTATTATTCATTTAGGG | TTAAGTGGGG | LG  |
